# Supplementary material for: Transcriptomic and protein–protein interaction network analyses of the molecular mechanisms underlying the mycorrhizal interaction in Cypripedium macranthos var. rebunense
Source: Front Plant Sci. 2025 Jul 10;16:1597154. doi: 10.3389/fpls.2025.1597154 (PMC12287105; doi:10.3389/fpls.2025.1597154)
Supplement: Supplementary file 2 [file Table1.xlsx]

## Sheet: Sheet1
Supplementay Table S1 Annotations and Log2FC values of DEGs used in the heatmap depicted in Figure 4B
		GO term_1		GO term_2	GO term_2	Log2FC				Gene ID	Annotation
						WO97-R-2w	WO97-R-4w	WO97-N-2w	WO97-N-4w
	Cluster 1		cell wall biogenesis		glucan metabolic process	-1.12895	-1.19085	-1.68866	-1.94653	TRINITY_DN145876_c0_g1_i1	XP_008785762.2 probable xyloglucan endotransglucosylase/hydrolase protein 10 [Phoenix dactylifera]
			cellulose biosynthetic process		plant-type primary cell wall biogenesis	-1.1829	-1.5371	-1.44535	-1.59437	TRINITY_DN14236_c0_g1_i1	XP_008792332.1 cellulose synthase A catalytic subunit 4 [UDP-forming] [Phoenix dactylifera]
			cellulose biosynthetic process		plant-type primary cell wall biogenesis	-1.16988	-1.52894	-1.33516	-1.36475	TRINITY_DN27244_c0_g1_i1	XP_020702765.1 cellulose synthase A catalytic subunit 4 [UDP-forming] isoform X1 [Dendrobium catenatum]
			polysaccharide catabolic process			-1.58615	-1.78883	-2.38023	-1.6849	TRINITY_DN17174_c0_g2_i8	XP_020702952.1 mannan endo-1,4-beta-mannosidase 1-like [Dendrobium catenatum]
			systemic acquired resistance			-2.01536	-1.36203	-2.41171	-1.28019	TRINITY_DN9103_c0_g1_i2	XP_008785477.2 uncharacterized protein LOC103704105 [Phoenix dactylifera]
			polysaccharide catabolic process			-2.37509	-1.56082	-2.81824	-1.53551	TRINITY_DN9957_c0_g1_i2	XP_020681645.1 beta-amylase 1, chloroplastic [Dendrobium catenatum]
			response to auxin			-2.23056	-2.33817	-2.66811	-2.64064	TRINITY_DN18391_c0_g1_i6	XP_020256397.1 LOW QUALITY PROTEIN: type IV inositol polyphosphate 5-phosphatase 11 [Asparagus officinalis]
			cell wall biogenesis		glucan metabolic process	-2.06382	-2.9281	-3.26484	-2.8265	TRINITY_DN5540_c0_g1_i24	XP_020703257.1 probable xyloglucan endotransglucosylase/hydrolase protein 32 [Dendrobium catenatum]
			polysaccharide catabolic process			-1.42864	-2.72681	-1.93044	-2.1422	TRINITY_DN41802_c0_g1_i1	XP_028556322.1 mannan endo-1,4-beta-mannosidase 6 [Dendrobium catenatum]
			response to auxin			-1.67858	-1.78078	-1.74377	-2.9958	TRINITY_DN62204_c0_g1_i1	XP_028549152.1 indole-3-acetic acid-induced protein ARG7-like [Dendrobium catenatum]
			cellulose biosynthetic process		plant-type primary cell wall biogenesis	-1.8409	-2.52794	-1.98063	-2.82339	TRINITY_DN10598_c0_g1_i1	XP_008785168.1 cellulose synthase A catalytic subunit 7 [UDP-forming] [Phoenix dactylifera]
			cellulose biosynthetic process		plant-type primary cell wall biogenesis	-1.59648	-2.30474	-1.56197	-2.49069	TRINITY_DN83578_c0_g1_i1	NP_001105532.1 cellulose synthase catalytic subunit 12 [Zea mays]
	Cluster 2		systemic acquired resistance			11.3388	10.6758	11.4466	8.29301	TRINITY_DN2562_c0_g1_i9	XP_034682574.1 EG45-like domain containing protein [Vitis riparia]
			defense response to bacterium			11.5965	11.5754	11.6984	8.87675	TRINITY_DN46130_c0_g1_i1	XP_021656791.1 pathogenesis-related protein PR-4 [Hevea brasiliensis]
			cellulose biosynthetic process		plant-type primary cell wall biogenesis	11.6954	11.6291	12.2195	9.10636	TRINITY_DN8957_c0_g1_i2	XP_010549830.1 PREDICTED: cellulose synthase-like protein D3 [Tarenaya hassleriana]
			systemic acquired resistance			12.4785	11.017	11.7081	9.7609	TRINITY_DN1058_c0_g1_i2	-
			carbohydrate transport			11.4704	10.9354	11.5806	10.0147	TRINITY_DN21670_c0_g1_i2	XP_020706020.1 bidirectional sugar transporter SWEET4-like [Dendrobium catenatum]
			carbohydrate transport			14.5382	13.8387	14.6737	12.227	TRINITY_DN5230_c0_g1_i1	XP_020671992.2 bidirectional sugar transporter SWEET14 [Dendrobium catenatum]
			carbohydrate transport			13.7923	11.8425	13.0843	9.53694	TRINITY_DN420_c0_g1_i32	XP_020706020.1 bidirectional sugar transporter SWEET4-like [Dendrobium catenatum]
			systemic acquired resistance			13.6861	12.4319	13.4065	10.4988	TRINITY_DN1058_c0_g2_i2	XP_031285123.1 EG45-like domain containing protein isoform X2 [Pistacia vera]
			systemic acquired resistance			13.9334	12.8288	13.9983	10.9078	TRINITY_DN2562_c0_g1_i2	XP_020578329.1 EG45-like domain containing protein [Phalaenopsis equestris]
			carbohydrate transport			13.7069	12.9663	13.4695	11.0868	TRINITY_DN11930_c0_g1_i1	XP_020580671.1 bidirectional sugar transporter SWEET14-like [Phalaenopsis equestris]
			systemic acquired resistance			13.891	13.1559	13.636	10.86	TRINITY_DN2562_c0_g1_i10	-
	Cluster 3		polysaccharide catabolic process			5.44275	5.00338	5.88771	2.56303	TRINITY_DN18467_c0_g1_i4	XP_020687011.2 glucan 1,3-beta-glucosidase A-like [Dendrobium catenatum]
			cellulose biosynthetic process		plant-type primary cell wall biogenesis	5.50681	4.70231	5.54484	3.12715	TRINITY_DN4514_c0_g1_i9	XP_008811269.2 cellulose synthase-like protein E6 isoform X3 [Phoenix dactylifera]
			response to wounding			4.63582	4.02185	4.90293	2.90854	TRINITY_DN1376_c0_g1_i2	-
			defense response to bacterium			4.18717	4.04801	4.5818	2.97583	TRINITY_DN9340_c0_g1_i1	XP_020677476.1 L-type lectin-domain containing receptor kinase IV.2-like [Dendrobium catenatum]
			systemic acquired resistance			4.61353	3.71133	4.49482	1.66749	TRINITY_DN2562_c0_g1_i3	XP_015896171.2 EG45-like domain containing protein [Ziziphus jujuba]
			response to wounding			4.50834	3.64832	4.78567	2.3192	TRINITY_DN1288_c0_g1_i1	-
			response to auxin			4.49004	3.89079	4.5071	2.22254	TRINITY_DN525_c0_g1_i1	XP_020674398.1 auxin-responsive protein SAUR21 [Dendrobium catenatum]
			carbohydrate transport			3.6893	3.37346	4.11417	2.54854	TRINITY_DN401_c0_g1_i2	XP_020706020.1 bidirectional sugar transporter SWEET4-like [Dendrobium catenatum]
			response to wounding			2.89431	2.99697	3.10574	1.31548	TRINITY_DN9534_c0_g1_i8	XP_027109130.1 subtilisin inhibitor CLSI-I-like [Coffea arabica]
			response to auxin			2.04449	1.89379	2.61447	1.98586	TRINITY_DN17691_c0_g1_i1	XP_008806780.2 auxin-responsive protein SAUR71 [Phoenix dactylifera]
			polysaccharide catabolic process			2.55113	2.50551	2.76146	1.17436	TRINITY_DN13172_c0_g1_i11	XP_028547395.1 mannan endo-1,4-beta-mannosidase 2-like [Dendrobium catenatum]
			response to wounding			2.81018	2.42857	2.72577	1.53564	TRINITY_DN3176_c0_g1_i2	XP_020699667.1 subtilisin-chymotrypsin inhibitor-2B [Dendrobium catenatum]
			defense response to bacterium			2.97688	2.55398	3.21184	1.35202	TRINITY_DN9178_c0_g1_i1	XP_020677497.1 L-type lectin-domain containing receptor kinase IV.1 [Dendrobium catenatum]
			response to wounding			3.19179	3.23714	3.64833	1.43166	TRINITY_DN9534_c0_g1_i6	XP_027109130.1 subtilisin inhibitor CLSI-I-like [Coffea arabica]
	Cluster 4		response to auxin			9.16785	5.61757	7.10583	4.14965	TRINITY_DN4146_c0_g1_i2	XP_010923788.1 auxin-responsive protein SAUR71-like [Elaeis guineensis]
			defense response to bacterium			7.56081	7.55538	7.8639	5.43706	TRINITY_DN49731_c0_g1_i1	XP_020591049.1 L-type lectin-domain containing receptor kinase IV.2-like [Phalaenopsis equestris]
			cell wall biogenesis		glucan metabolic process	7.46516	6.08459	7.53969	4.29006	TRINITY_DN5032_c0_g1_i2	XP_020697143.1 xyloglucan endotransglucosylase/hydrolase protein 24-like [Dendrobium catenatum]
			polysaccharide catabolic process			7.23783	6.63208	7.36286	4.98982	TRINITY_DN1866_c0_g1_i3	XP_020597111.1 uncharacterized protein LOC110036902 [Phalaenopsis equestris]
			polysaccharide catabolic process			6.70202	7.09156	6.92036	4.73343	TRINITY_DN6357_c0_g1_i1	XP_020687011.2 glucan 1,3-beta-glucosidase A-like [Dendrobium catenatum]
			cell wall biogenesis		glucan metabolic process	8.53155	8.23768	8.80657	6.11977	TRINITY_DN6558_c0_g1_i1	XP_020676972.1 xyloglucan endotransglucosylase/hydrolase protein 2 [Dendrobium catenatum]
			carbohydrate transport			9.57238	7.6779	9.10064	5.65123	TRINITY_DN11995_c0_g1_i1	XP_020706020.1 bidirectional sugar transporter SWEET4-like [Dendrobium catenatum]
			systemic acquired resistance			9.37402	7.98503	9.32654	6.03093	TRINITY_DN16099_c0_g1_i1	XP_035549491.1 EG45-like domain containing protein [Juglans regia]
			systemic acquired resistance			9.9429	8.9149	9.77264	6.82259	TRINITY_DN11354_c0_g1_i1	-
			response to auxin			10.7122	8.90739	9.82421	6.4359	TRINITY_DN397_c0_g1_i1	-
			carbohydrate transport			10.3254	8.968	9.82844	6.00147	TRINITY_DN4955_c0_g1_i1	XP_020700756.1 bidirectional sugar transporter SWEET4-like [Dendrobium catenatum]
			response to auxin			9.10172	9.70728	8.82656	6.81178	TRINITY_DN1102_c0_g1_i2	XP_020266159.1 auxin-responsive protein SAUR71-like [Asparagus officinalis]
			response to auxin			9.69097	10.2236	10.3237	7.07362	TRINITY_DN125931_c0_g1_i1	XP_010923788.1 auxin-responsive protein SAUR71-like [Elaeis guineensis]
			systemic acquired resistance			9.90056	10.191	10.3797	7.64869	TRINITY_DN14193_c0_g1_i7	-
